# Supplementary material for: Helical self-assembly and nonlinear optical properties of optically active phthalocyanine derivatives bearing eight optically active diethyleneglycol mono-(S)-2-methylbutyl ether moieties on the β-position of the phthalocyanine ring
Source: Royal Society of Chemistry journal article supplement (doi:10.1039/c3ra44164d), 2013-01-01
Supplement: c3ra44164d.pdf [file c3ra44164d.pdf]

## Supporting Information

**Helical Self-assembly and Nonlinear Optical Properties of Optically Active Phthalocyanine Derivatives Bearing Eight Optically Active Diethyleneglycol mono-(*S*)-2-methylbutyl Ether Moieties on the  $\beta$ -Position of the Phthalocyanine Ring**

**Jing Tian, Lu Jing, Lisha Ji, Congcong Zhang, Qingyun Liu, and Xiaomei Zhang\***

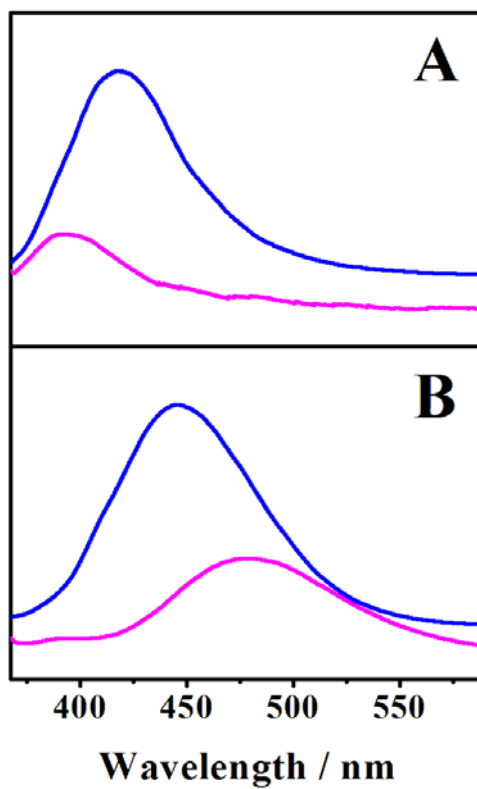

**Figure S1.** Fluorescence spectra of (A) **1** in  $\text{CHCl}_3$  (blue line) and its aggregates formed in  $\text{CHCl}_3/\text{MeOH}$  [1:3 (v/v)] (pink line); (B) **2** in  $\text{CHCl}_3$  (blue line) and its aggregates formed in  $\text{CHCl}_3/\text{MeOH}$  [1:3 (v/v)] (pink line).

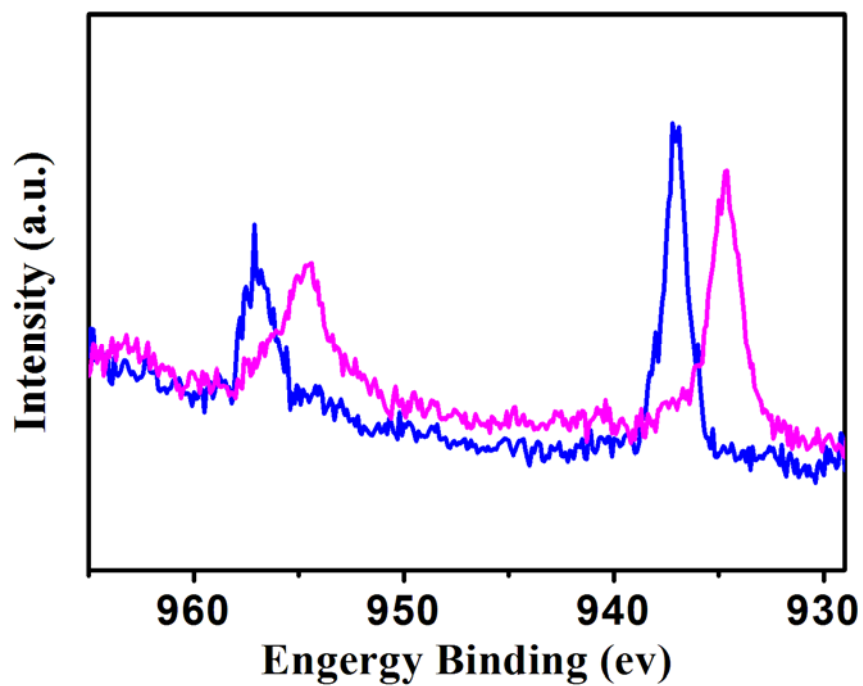

**Figure S2.** X-ray photoelectron spectra for (*S*)-CuPc (**2**) (blue line) and its aggregates formed in CHCl<sub>3</sub>/MeOH [1:3 (v/v)] (pink line).

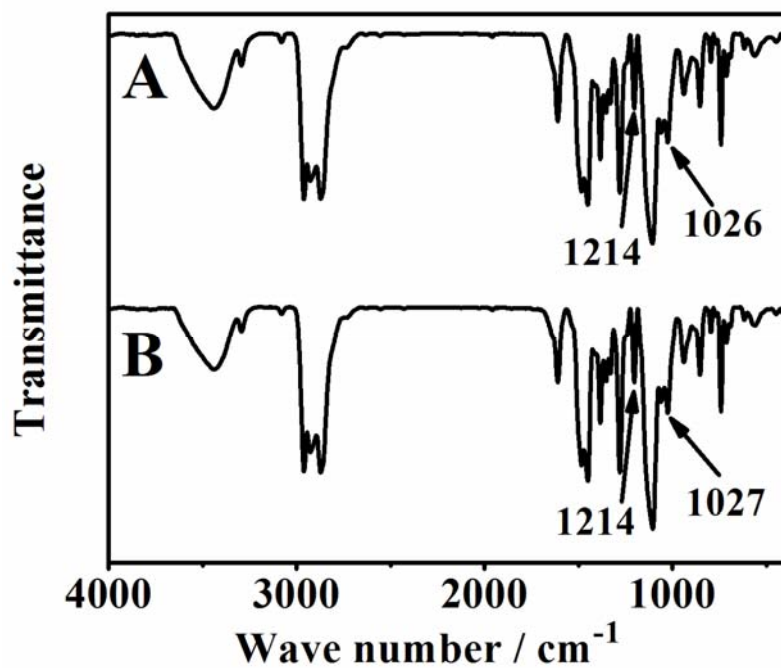

**Figure S3.** IR spectra of (*S*)-H<sub>2</sub>Pc (**1**) (A) and its aggregates formed in CHCl<sub>3</sub>/MeOH [1:3 (v/v)] (B) in the region of 400-4000 cm<sup>-1</sup> with 2 cm<sup>-1</sup> resolution.

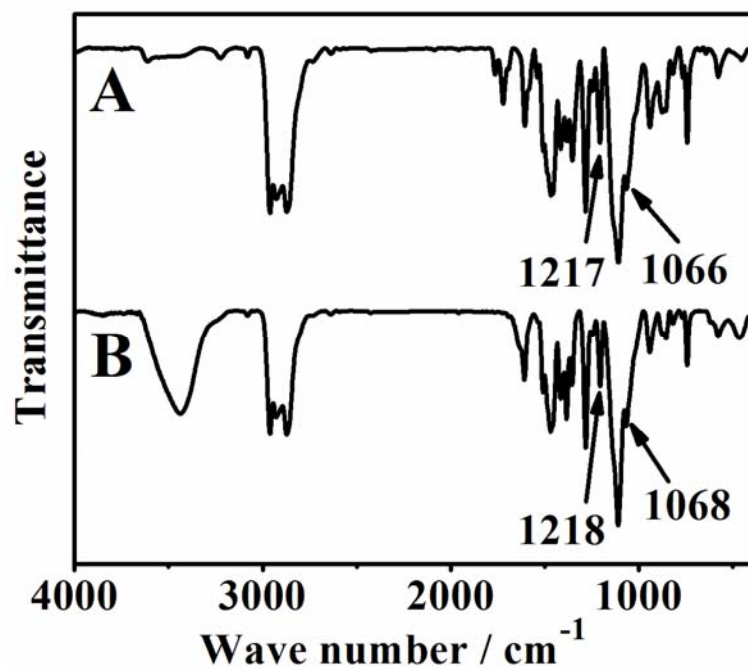

**Figure S4.** IR spectra of (*S*)-CuPc (**2**) (A) and its aggregates formed in CHCl<sub>3</sub>/MeOH [1:3 (v/v)] (B) in the region of 400-4000 cm<sup>-1</sup> with 2 cm<sup>-1</sup> resolution.

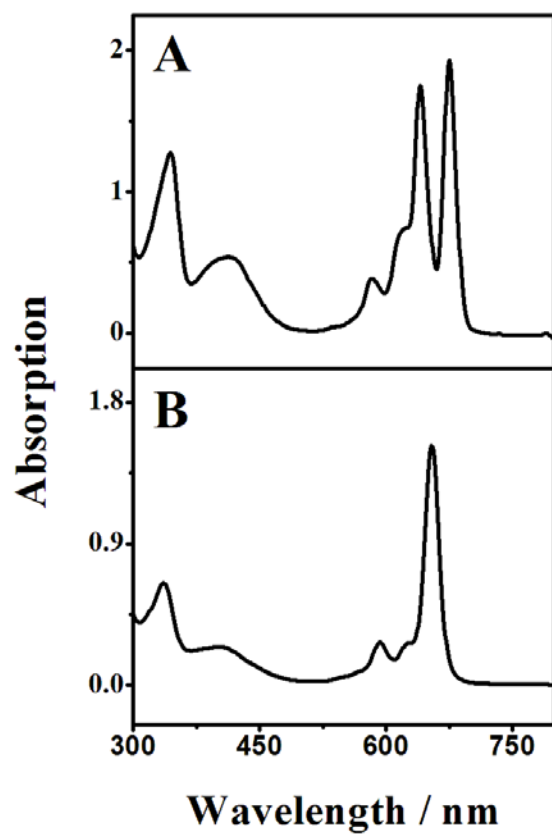

**Figure S5.** Electronic absorption spectra of (A) (*S*)-H<sub>2</sub>Pc (**1**) in dilute chloroform solution ( $4 \times 10^{-5}$  mol/L); (B) (*S*)-CuPc (**2**) in dilute chloroform solution ( $4 \times 10^{-5}$  mol/L).

**Table S1.** Electronic absorption spectral data for (*S*)-H<sub>2</sub>Pc (**1**) and (*S*)-CuPc (**2**) dissolved in CHCl<sub>3</sub> and their aggregates fabricated from **1** and **2** in CHCl<sub>3</sub>/MeOH [1:3 (v/v)].

| Compound                                    | in chloroform                | in CHCl <sub>3</sub> /MeOH [1:3 (v/v)] |
|---------------------------------------------|------------------------------|----------------------------------------|
| ( <i>S</i> )-H <sub>2</sub> Pc ( <b>1</b> ) | 344, 413, 580, 618, 639, 674 | 342, 397, 598                          |
| ( <i>S</i> )-CuPc ( <b>2</b> )              | 337, 405, 590, 625, 652      | 358, 629, 682                          |
